# Supplementary material for: Health Promotion Practice Among Older Persons: A Nordic Multi-Professional Focus Group Study Exploring what It Is and How It Could be Achieved
Source: PubMed Central journal article supplement (PMC9210104; doi:10.1177/07334648221082021), 2022-03-27
Supplement: sj-pdf-1-jag-10.1177_07334648221082021.pdf [file sj-pdf-1-jag-10.1177_07334648221082021.pdf]

## Supplementary material

### Supplementary file 1

#### COREQ 32-item checklist for interviews and focus groups (Tong, Sainsbury & Craig, 2007)

---

| <b>Research team and reflexivity</b>  |                                          |                                                                                                                                                                                                                                                                                                                                                                                                                     |
|---------------------------------------|------------------------------------------|---------------------------------------------------------------------------------------------------------------------------------------------------------------------------------------------------------------------------------------------------------------------------------------------------------------------------------------------------------------------------------------------------------------------|
| 1.                                    | Interviewer/facilitator                  | The authors 1, 3 and 4 conducted the interviews.                                                                                                                                                                                                                                                                                                                                                                    |
| 2.                                    | Credentials                              | Author 1 = MSocSc<br>Author 2 = PhD<br>Author 3 = PhD<br>Author 4 = DrPH                                                                                                                                                                                                                                                                                                                                            |
| 3.                                    | Occupation                               | Author 1 = Doctoral student<br>Author 2 = Project researcher<br>Author 3 = Associate Professor<br>Author 4 = Associate Professor                                                                                                                                                                                                                                                                                    |
| 4.                                    | Gender                                   | All of the researchers are female.                                                                                                                                                                                                                                                                                                                                                                                  |
| 5.                                    | Experience and training                  | Author 1 = In doctoral training<br>Author 2 = Has participated in planning and conducting multiple focus group studies.<br>Author 3 = Had led national research projects focusing on older persons and health in everyday life and health promotion interventions and RCT studies.<br>Author 4 = Has led several national and international research projects focusing on health promotion contexts and approaches. |
| <b>Relationship with participants</b> |                                          |                                                                                                                                                                                                                                                                                                                                                                                                                     |
| 6.                                    | Relationship established                 | The researchers were not employed by any of the organizations that the practitioners represented. The recruitment of informants report no bias grounded on dependency issues.                                                                                                                                                                                                                                       |
| 7.                                    | Participant knowledge of the interviewer | All of the informants knew which organizations the researchers represented and their research interests in older adults' health and wellbeing.                                                                                                                                                                                                                                                                      |
| 8.                                    | Interviewer characteristics              | In the strengths and limitations section, the researchers' preunderstandings as health promotion scientists are highlighted as potential bias.                                                                                                                                                                                                                                                                      |
| <b>Theoretical framework</b>          |                                          |                                                                                                                                                                                                                                                                                                                                                                                                                     |
| 9.                                    | Methodological orientation and theory    | Exploratory, inductive, qualitative content analysis.                                                                                                                                                                                                                                                                                                                                                               |

---

| <b>Participant selection</b> |                              |                                                                                                                                                                                                                                                                                                                                                    |
|------------------------------|------------------------------|----------------------------------------------------------------------------------------------------------------------------------------------------------------------------------------------------------------------------------------------------------------------------------------------------------------------------------------------------|
| 10.                          | Sampling                     | Purposeful sampling                                                                                                                                                                                                                                                                                                                                |
| 11.                          | Method of approach           | Email and Phone                                                                                                                                                                                                                                                                                                                                    |
| 12.                          | Sample size                  | 34                                                                                                                                                                                                                                                                                                                                                 |
| 13.                          | Non-participation            | Ten persons declined or did not respond to the invitation. One person dropped out from the study due to being ill when the focus group were held.                                                                                                                                                                                                  |
| 14.                          | Setting of data collection   | The focus groups were conducted in various places and settings, such as the universities, the informants' workplaces and city halls. The focus group location was chosen in order to be convenient and easily accessed by the informants. One informant also participated in the group discussions via Skype, due to sudden logistical challenges. |
| 15.                          | Presence of non-participants | -                                                                                                                                                                                                                                                                                                                                                  |
| 16.                          | Description of sample        | Practitioners, representing different organizations, educational levels and professions, working with health promotion targeting community-dwelling older adults, with at least one year of work experience. Description of the focus groups and the informants are displayed in Table 1.                                                          |
| <b>Data collection</b>       |                              |                                                                                                                                                                                                                                                                                                                                                    |
| 17.                          | Interview guide              | An interview guide encompassing broad themes and related questions was used (see supplementary material). The interview guide was not pilot tested, but was continuously discussed within the research group.                                                                                                                                      |
| 18.                          | Repeat interviews            | -                                                                                                                                                                                                                                                                                                                                                  |
| 19.                          | Audio/visual recording       | Audio recording was used to collect data.                                                                                                                                                                                                                                                                                                          |
| 20.                          | Field notes                  | The interviewers made notes during the focus groups.                                                                                                                                                                                                                                                                                               |
| 21.                          | Duration                     | One and up to two hours, dependent on the group size.                                                                                                                                                                                                                                                                                              |
| 22.                          | Data saturation              | Data saturation was discussed among the researchers after the 8th interview and the researchers decided to not recruit more focus groups than the nine groups that were already appointed.                                                                                                                                                         |
| 23.                          | Transcripts returned         | -                                                                                                                                                                                                                                                                                                                                                  |
| <b>Data analysis</b>         |                              |                                                                                                                                                                                                                                                                                                                                                    |
| 24.                          | Number of data coders        | One researcher conducted the initial coding of the data and all                                                                                                                                                                                                                                                                                    |

---

|                  |                                |                                                                                                                                                                                           |
|------------------|--------------------------------|-------------------------------------------------------------------------------------------------------------------------------------------------------------------------------------------|
| 25.              | Description of the coding tree | four worked with generating the categories and theme.<br>Table 2 displays the codes, sub-categories, main-categories and the theme and Figure 1 is an illustration of the coding process. |
| 26.              | Derivation of themes           | The theme, main categories and sub-categories were derived from the data.                                                                                                                 |
| 27.              | Software                       | Microsoft Word                                                                                                                                                                            |
| 28.              | Participant checking           | -                                                                                                                                                                                         |
| <b>Reporting</b> |                                |                                                                                                                                                                                           |
| 29.              | Quotations presented           | The questions are presented in supplementary files. Each quotation is identified by reporting the informants' codes.                                                                      |
| 30.              | Data and findings consistent   | The authors have made an effort to keep the findings close to the original data and the authors who conducted the interviews did recognize the discussions in the final findings.         |
| 31.              | Clarity of major themes        | The major themes are described in text as well as in Table 2 and Figure 1.                                                                                                                |
| 32.              | Clarity of minor themes        | The minor themes are described in the text as well as in the Table 2 and Figure 1.                                                                                                        |

---

## **Supplementary file 2**

### **Interview guide**

Original language of the interview guide was Swedish. The guide was translated into English by the authors.

#### **1. Theme: Everyday work**

Tell us about your work. What are your main areas of responsibility and main tasks?

Could you tell us about your work right now, focusing on the positive experiences?

Do you experience any challenges? What could be improved?

#### **2. Theme: Health promotion**

In your view, what is health promotion? And health promotion work? Can you give any examples from your own work?

What do you think about user involvement, i.e. involving the target group, in this case the older adults, in the activities. Can you give any examples from your own work?

#### **3. Theme: The future**

With the discussions of today in mind, if you look 20 years ahead in time, what do you think the situation will look like then? In relation to your work and your work tasks.

**If themes related to technology and innovation have not been addressed in the discussions:** What is your view on technology in relation to health promotion in later life? In relation to your work tasks? Now and in the future.
